# Supplementary material for: Clostridium perfringens enterotoxin induces claudin-4 to activate YAP in oral squamous cell carcinomas
Source: PubMed Central journal article supplement (PMC6996904; doi:10.18632/oncotarget.27424), 2020-01-28
Supplement: oncotarget-11-309-s001.pdf [file oncotarget-11-309-s001.pdf]

## Clostridium perfringens enterotoxin induces claudin-4 to activate YAP in oral squamous cell carcinomas

### SUPPLEMENTARY MATERIALS

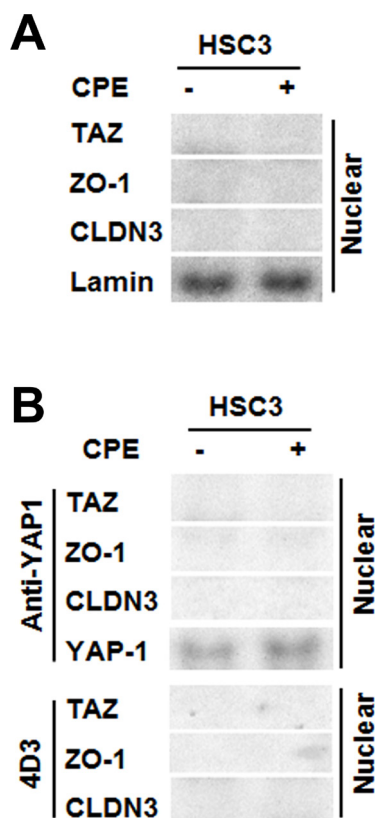

**Supplementary Figure 1: Effect of CPE on interaction of CLDN3, TAZ and ZO-1 in OSCC cells.** (A) Effect of CPE (10  $\mu$ g/ml) on intranuclear protein levels of TAZ, ZO-1 and CLDN3 was examined by immunoblotting. Lamin was subjected as a loading control. (B) Intranuclear interaction of TAZ, ZO-1 or CLDN3 with YAP1 or CLDN4 was examined by immunoprecipitation.
